# Supplementary material for: Range-Adaptive Value Representation in Different Stages of Schizophrenia: A Proof of Concept Study
Source: Oxford University Press journal article supplement (doi:10.1093/schbul/sbab099), 2021-08-05
Supplement: sbab099_suppl_supplementary_material.doc [file sbab099_suppl_supplementary_material.doc]

**Supplementary Materials**

**Supplementary Methods**

*Operational criteria for FE-SCZ, HSoA and HSoA-Control*

Our first-episode sample was recruited in a well-established early psychosis intervention program in Hong Kong, which used predefined tool to assess clinical patients at service entry. In our study, all FE-SCZ have received clinical interview by psychiatrists, and they all found to have only 1 episode of schizophrenia, without history of relapse. The operational criteria were as follows: (1) having a past psychotic episode necessitate antipsychotic medication treatments in outpatient or inpatient settings, (2) being a patient under the care of the Hong Kong early psychosis intervention service, (3) absence of a relapse of psychotic episode after a period of complete remission, which necessitated a re-trial of antipsychotic medications or psychiatric hospitalization, (4) having clinical stabilization at the time of assessment, as defined by scoring less than 5 in all items in PANSS positive subscale.

Our HSoA and HSoA-control sample was recruited based on the reference scores found from a previous large-sample study1. 887 Chinese nonclinical college students was administered the RCSAS. Their mean and standard deviations(SD) on RCSAS was 8.505 and 5.83. Based on that, we recruited the HSoA as those who scored 1.5 SD above the mean (RCSAS>=17) and the HSoA-Control as those who scored below the mean (RCSAS <=7).

*Additional medication information*

For the FE-SCZ sample, all participants were receiving second-generation antipsychotic monotherapy at the time of assessments (risperidone, n = 3; olanzapine, n = 4; amisulpride, n = 5; paliperidone, n = 2; quetiapine, n = 1; clozapine, n = 3; aripiprazole, n = 5; aripiprazole and clozapine, n = 3; aripiprazole and risperidone, n = 1; aripiprazole and paliperidone, n = 1; aripiprazole and amisulpride, n = 1; olanzapine and risperidone, n = 1). Among them, 3 were receiving long-acting injectable second-generation antipsychotic. All FE-SCZ participants have been receiving the regimen unchanged for more than 4 weeks.

For the C-SCZ sample, 24 participants were receiving second-generation antipsychotic at the time of assessments (risperidone, n = 1; olanzapine, n = 7; paliperidone, n = 4; quetiapine, n = 2; clozapine, n = 7; aripiprazole and risperidone, n = 1; aripiprazole and Quetiapine, n = 1; olanzapine and risperidone, n = 1), and 6 participants were receiving first-generation antipsychotic at the time of assessments (trifluoperazine, n = 1; fluphenazine, n = 2; flupenthixol, n = 2; zuclopenthixol, n = 1). Among them, 6 were receiving long-acting injectable antipsychotic medications (first-generation medication, n = 4; second-generation medication, n = 2). All C-SCZ participants have been receiving the regimen unchanged for more than 4 weeks.

*Other measures*

The Revised Chapman Social Anhedonia Scale (RCSAS) was used to measure the participants' social anhedonia1,2. The Anticipatory and Consummatory Interpersonal Pleasure Scale (ACIPS) was used to measure both anticipatory and consummatory pleasure for interpersonal activities3,4. IQ was estimated using the short-form (i.e., the information, digit span, arithmetic and similarities subtests) of the Chinese version of the Wechsler Adult Intelligence Scale—Revised 5. Clinical symptoms were evaluated using the Positive and Negative Syndrome Scale (PANSS6) and the Scale assessment for Negative Symptom (SANS7).

*Data analysis*

In the field of behavioural decision making, range adaptation has been associated with the interaction effect between the stimulus value and the context it was embedded. Range adaptation would predict an increased behavioural difference in response to value A and B embedded in the narrow value range as opposed to the wide value range8, that is, the slope increases as the range narrows. The range adaptation effect have been found in the choice percentage and reaction time of healthy controls while they were making decisions8–10. Based on that, to define the extent of range adaptation, we used the difference between two response slopes for two value ranges. However, we cannot simply subtract the slope in the wide range from the narrow range since they were estimated with error. Instead, a regression model was fitted to estimate the extent of the slope difference between the narrow and wide value range. The model was built as follows:


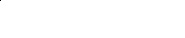


Where 
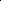
 is the consummatory pleasure each participant rated for each trial,
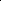
 is the exact outcome value they received at each trial and
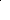
 is the dummy variable, indicating which range each outcome value
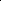
 belongs to (narrow = 1 or wide = 0).
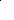
 denotes for the model intercept,
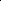
 denotes for the slope of variable x at the wide range while the
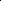
 denotes for the difference in slopes of the two ranges.

When the model was fitted to the data set, the estimated coefficient
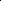
 for each participant was the main index (∆beta value) we used for indicating the extent of range adaptation. In the meantime, since the
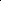
(i.e, ∆beta) was estimated, it also has its own estimation error. Large estimation errors could point to the poor model fitting procedure. Thus, participants whose estimated errors of ∆beta value were more than 2.5 SD from the group means were excluded from the analysis.

To check the validity of using ∆beta value as measurements of range adaption, data from three healthy control groups were first merged. Their ∆beta value were then tested using a one-sample t-test(as compared to “0”, no difference between the slopes for narrow and wide range) to see whether range adaptation phenomenon could be observed. Correlations with motivation measures were also conducted.

It should be noted that for the HSoA group, due to the lack of clinical symptom ratings, we also included two extra indexes from the E-pet task performance during the correlation analysis with range adaptation performance. These included the highest and lowest rewarded condition in the task as suggested by previous study11.

**Supplementary Results**

We first tested the validity of using ∆beta value as range adaptation measure. Among three merged control groups, we found the ∆beta value was significantly larger than zero(*t90*=13.132, *p < .001,* Cohen’s d = 1.376,CI=[0.682,0.925]), that is, the slope from the narrow range were significantly larger than the slope from the wide range, suggesting the existence of range adaptation. We also found correlations between ∆beta value and the ACIPS anticipatory(*r91*=0.160, *p* =.129) and consummatory subscale scores(*r90*=0.159, *p* =.133), though the result was non-significant, possibly due to the limited variance of motivation level within these controls. These results on control groups supported the validity of using ∆beta value as measuring range adaptation and also partially supported the link between range adaptation with motivation and pleasure.

For the correlation analysis on clinical samples, except for the significant correlation between ∆beta value and SANS avolition score found in FE-SCZ, no other significant correlations with clinical symptoms were found (see Table S1).

Moreover, it would be misleading to claim that the correlation between SANS avolition and range adaptation is specific, if such concludion is drawn based on the results of two separately conducted tests which one is statistically significant (P < 0.05) but the other is not (P > 0.05)12,13. We therefore presented the confidence intervals to remind readers not to commit to this way of statistical errors.

To further contrast the correlation coefficients derived separately from two correlational analyses, we employed additional “direct comparisons” between correlation coefficients, based on the procedures proposed by Eid and his colleague14. We directly compared the correlation coefficients between the range adaptation performance with SANS avolition scores against its correlations with all other clinical symptoms, so as to examine whether range adaptation would be relatively specifically to amotivation. Based on this hypothesis, one-sided test was used. The aim was to see whether range adaptation would be specifically related to amotivation symptoms rather than other clinical symptoms.

For the first-episode SCZ group, the correlation between range adaptation and SANS avolition was found to be significantly stronger than the correlation between range adaption and other negative symptom domains (including SANS alogia, attention, blunted affect and anhedonia scores, the PANSS general and amotivation scores). For the chronic SCZ group, the correlation between range adaptation and SANS avolition was comparable to the correlations between range adaptation and the PANSS positive symptom. We also found that the correlations of range adaptation with SANS avolition, and those with the PANSS general score, SANS alogia and anhedonia scores did not differ in the C-SCZ group.

For the merged correlation analysis across the FE-SCZ, C-SCZ and HSoA samples, we found a significant negative correlation between ∆beta value and total proportion of choosing high-effort task in E-pet under the highest rewarded condition (*r86* =-0.259, *p* =.016, CI=[0.001,0.416]). We also merged all the present six samples and reconducted the analysis. The result was again significant(*r176* =-0.231, *p* =.002, CI=[-0.365,-0.083]).

**Table S1. The correlations of range adaptation performance with clinical symptoms, medication dosage, self-reported and behavioural amotivation indexes**

|  | **C-SCZ ∆beta value** | |  |  | **FE-SCZ ∆beta** | |  |
| --- | --- | --- | --- | --- | --- | --- | --- |
| **Variables** | ***r*** | **95% CI** | ***p*** |  | ***r*** | **95% CI** | ***p*** |
| PANSS positive | -0.271 | [-0.608,0.148] | 0.199 (0.487) |  | -0.005 | [-0.377,0.369] | 0.980 (0.995) |
| PANSS amotivation | -0.125 | [-0.503,0.293] | 0.56 (0.749) |  | 0.098 | [-0.285,0.455] | 0.619 (0.995) |
| PANSS general | -0.102 | [-0.486,0.314] | 0.635 (0.762) |  | 0.012 | [-0.363,0.383] | 0.951 (0.995) |
| SANS avolition | -0.248 | [-0.592,0.172] | 0.242 (0.487) |  | -0.387* | [-0.664,-0.016] | 0.042 (0.294) |
| SANS anhedonia | 0.077 | [-0.337,0.466] | 0.722 (0.788) |  | -0.001 | [-0.374,0.372] | 0.995 (0.995) |
| SANS blunted affect | 0.325 | [-0.090,0.644] | 0.121 (0.487) |  | -0.100 | [-0.456,0.284] | 0.614 (0.995) |
| SANS alogia | 0.034 | [-0.375,0.431] | 0.875 (0.875) |  | -0.022 | [-0.392,0.354] | 0.911 (0.995) |
| SANS attention | 0.241 | [-0.180,0.587] | 0.257 (0.487) |  | -0.154 | [-0.499,0.232] | 0.433 (0.995) |
| CPZ equivalence dosage | 0.237 | [-0.184,0.585] | 0.264(0.487) |  | -0.256 | [-0.574,0.129] | 0.188 (0.752) |
| ACIPS anticipatory | 0.228 | [-0.193,0.578] | 0.284(0.487) |  | 0.222 | [-0.165.0.549] | 0.256(0.768) |
| ACIPS consummatory | 0.340 | [-0.074,0.653] | 0.105(0.487) |  | 0.052 | [-0.328,0.417] | 0.793(0.995) |
| Proportion of hard-task choice | -0.125 | [-0.503,0.294] | 0.562(0.749) |  | 0.376 | [0.003,0.657] | 0.049(0.294) |

Note. The inserted value was the correlation coefficients from the correlation result. Numbers in brackets denotes FDR corrected p values.

CPZ = Chlopramazine; PANSS = the Positive and Negative Syndrome Scale; SANS = the Schedule for Assessment of Negative Symptoms.

**Table S2. Directly comparing the correlation between range adaptation and SANS avolition against the correlations of different clinical symptom variables**

|  | **C-SCZ** | |  | | | | **FE-SCZ** | | |
| --- | --- | --- | --- | --- | --- | --- | --- | --- | --- |
| **Variables to be compared against with the correlation between ∆beta value and SANS avolition** | ***z*** | ***p*** | |  | | ***z*** | | ***p*** |  |
| PANSS positive subscale | 0.075 | 0.470 (0.470) | | |  | -1.580 | | 0.057 (0.057) |  |
| PANSS amotivation factor | -0.621 | 0.267 (0.313) | | |  | -2.575 | | 0.005 (0.014) |  |
| PANSS general subscale | -0.777 | 0.218 (0.305) | | |  | -1.935 | | 0.027 (0.032) |  |
| SANS anhedonia | -1.507 | 0.066 (0.154) | | |  | -2.821 | | 0.002 (0.014) |  |
| SANS blunted affect | -1.868 | 0.031 (0.154) | | |  | -2.182 | | 0.015 (0.021) |  |
| SANS alogia | -0.844 | 0.199 (0.305) | | |  | -2.441 | | 0.007 (0.014) |  |
| SANS attention | -1.658 | 0.049 (0.154) | | |  | -2.395 | | 0.008 (0.014) |  |

Note. The inserted value was the resulted z and uncorrected p value from the specific Z test. Numbers in brackets were FDR corrected p values. PANSS = the Positive and Negative Syndrome Scale; SANS = the Schedule for Assessment of Negative Symptoms

**Figure S1**


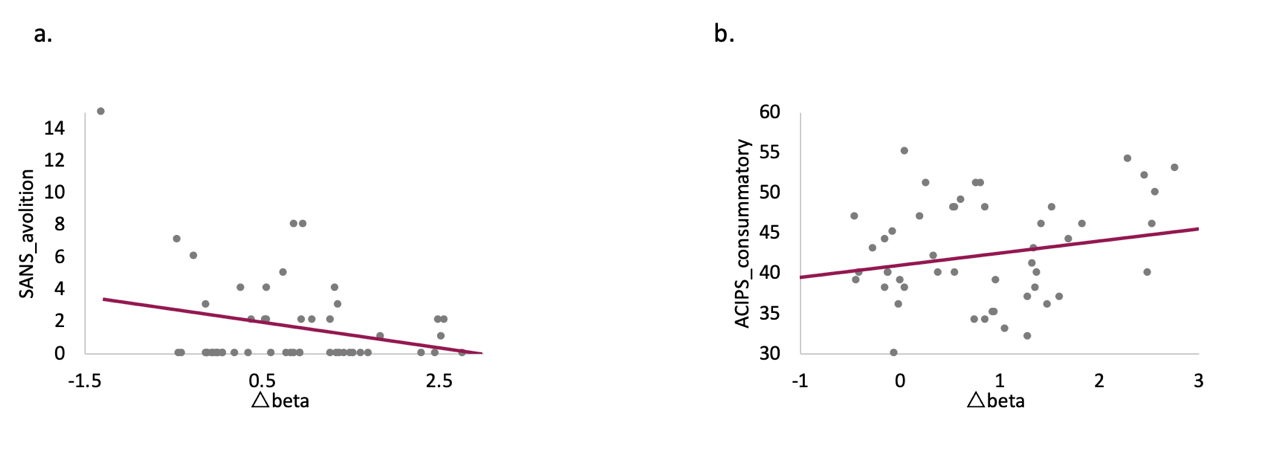


Figure S1. Correlation with range adaptation performance across the C-SCZ and FE-SCZ group. (a): correlation between the range adaptation capacity and the SANS avolition scores. (b): correlation between the range adaptation capacity and the proportion of choosing high-effort task in the E-pet task. △beta = slope difference between the narrow and wide range. C-SCZ = Chronic patients with schizophrenia; FE-SCZ = First-episode patients with schizophrenia.

**Figure S2**


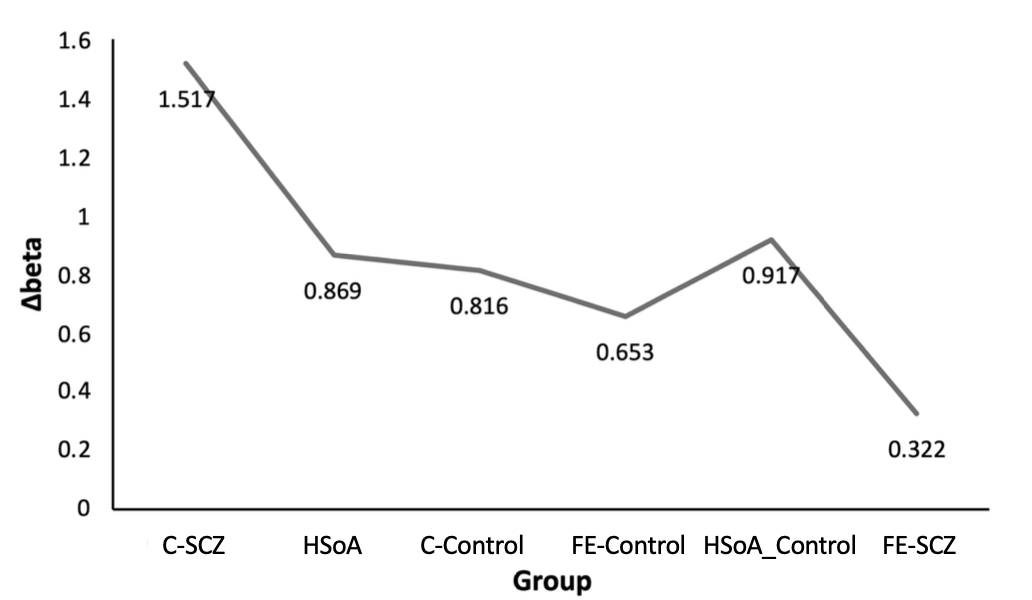


Figure S2. The range adaptation performance among all groups. C-SCZ=Chronic patients with schizophrenia; FE-SCZ=First-episode patients with schizophrenia; C-Control: control group paired with the C-SCZ group; FE-Control: control group paired with the FE-SCZ group; HSoA= individuals with high social anhedonia scores; HSoA-control= control group paired with the HSoA group.

References

1. Chan RCK, Wang Y, Yan C, et al. A Study of Trait Anhedonia in Non-Clinical Chinese Samples: Evidence from the Chapman Scales for Physical and Social Anhedonia. Mazza M, ed. *PLoS ONE*. 2012;7(4):e34275. doi:10.1371/journal.pone.0034275

2. Chapman LJ, Chapman JP, Raulin ML. Scales for physical and social anhedonia. *Journal of abnormal psychology*. 1976;85(4):374.

3. Chan RCK, Wang Y, Huang J, et al. Anticipatory and consummatory components of the experience of pleasure in schizophrenia: cross-cultural validation and extension. *Psychiatry Research*. 2010;175(1-2):181-183.

4. Gard DE, Kring AM, Gard MG, Horan WP, Green MF. Anhedonia in schizophrenia: distinctions between anticipatory and consummatory pleasure. *Schizophrenia research*. 2007;93(1-3):253-260.

5. Gong YX. Wechsler adult intelligence scale-revised in China Version. *Hunan Medical College, Changsha, Hunan/China*. Published online 1992.

6. Kay SR, Fiszbein A, Opler LA. The Positive and Negative Syndrome Scale (PANSS) for Schizophrenia. *Schizophrenia Bulletin*. 1987;13(2):261-276. doi:10.1093/schbul/13.2.261

7. Andreasen NC. The Scale for the Assessment of Negative Symptoms (SANS): conceptual and theoretical foundations. *Br J Psychiatry Suppl*. 1989;(7):49-58.

8. Rigoli F, Friston KJ, Dolan RJ. Neural processes mediating contextual influences on human choice behaviour. *Nat Commun*. 2016;7(1):12416. doi:10.1038/ncomms12416

9. Cox KM, Kable JW. BOLD Subjective Value Signals Exhibit Robust Range Adaptation. *Journal of Neuroscience*. 2014;34(49):16533-16543. doi:10.1523/jneurosci.3927-14.2014

10. Holper L, Van Brussel LD, Schmidt L, et al. Adaptive Value Normalization in the Prefrontal Cortex Is Reduced by Memory Load. *eNeuro*. 2017;4(2):ENEURO.0365-17.2017. doi:10.1523/ENEURO.0365-17.2017

11. Reddy LF, Horan WP, Barch DM, et al. Effort-Based Decision-Making Paradigms for Clinical Trials in Schizophrenia: Part 1—Psychometric Characteristics of 5 Paradigms. *Schizophr Bull*. 2015;41(5):1045-1054. doi:10.1093/schbul/sbv089

12. Nieuwenhuis S, Forstmann BU, Wagenmakers E-J. Erroneous analyses of interactions in neuroscience: a problem of significance. *Nat Neurosci*. 2011;14(9):1105-1107. doi:10.1038/nn.2886

13. Rousselet GA, Pernet CR. Improving standards in brain-behavior correlation analyses. *Front Hum Neurosci*. 2012;6:119. doi:10.3389/fnhum.2012.00119

14. Eid M, Gollwitzer M, Schmitt M. *Statistik und Forschungsmethoden*.; 2017. Accessed July 4, 2021. https://sfbs.tu-dortmund.de/handle/sfbs/3110
